# Supplementary material for: Cytotoxic granule endocytosis depends on the Flower protein
Source: PubMed Central journal article supplement — J Cell Biol. 2018 Feb 5;217(2):667–83. doi: 10.1083/jcb.201706053 (PMC5800809; doi:10.1083/jcb.201706053), 2018-02-05
Supplement: JCB_201706053_sm.pdf [file JCB_201706053_sm.pdf]

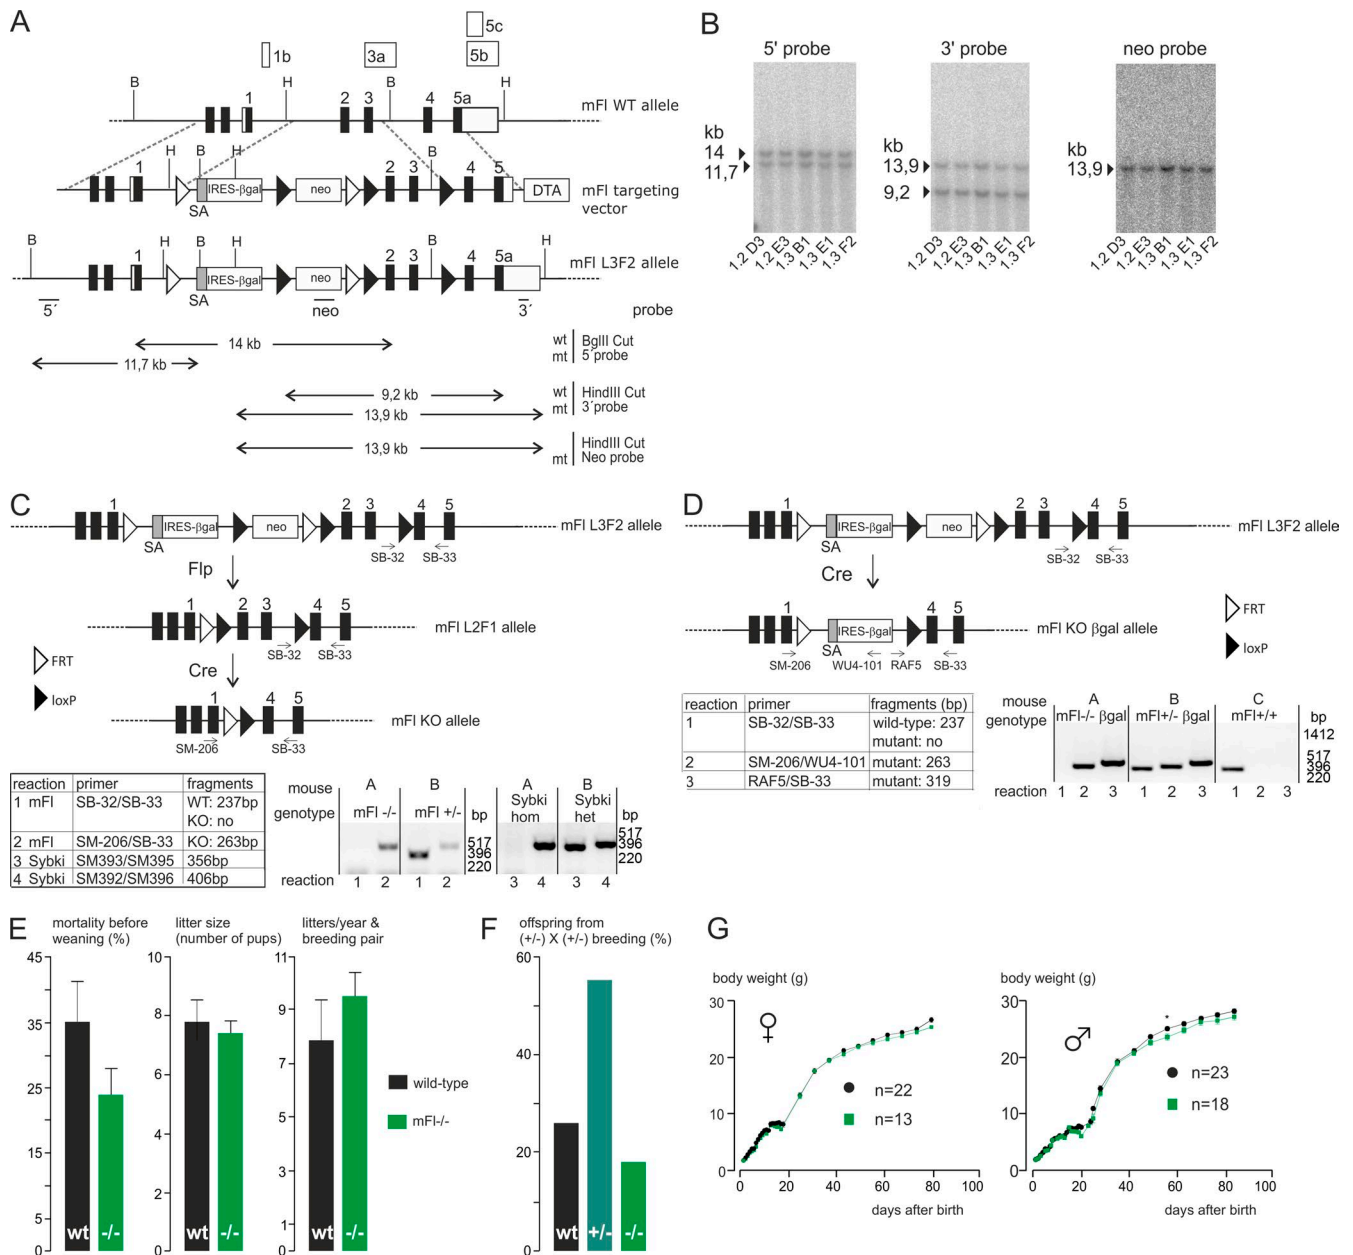

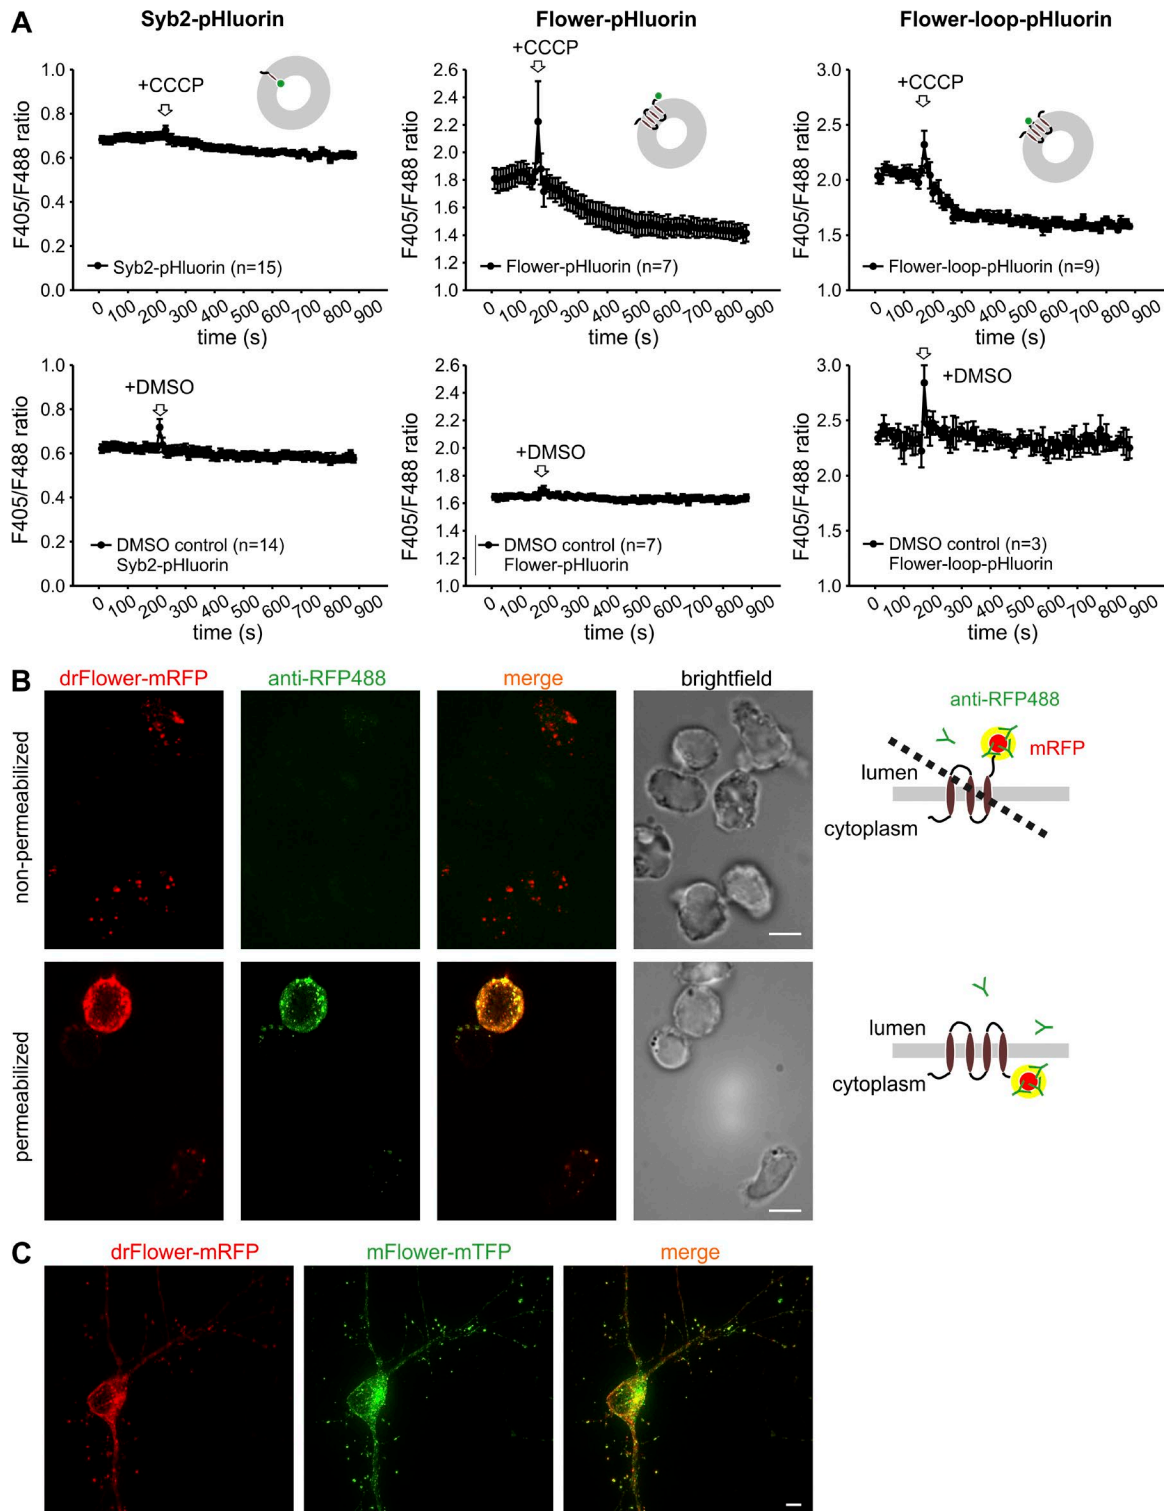

Figure S3. **Flower contains four transmembrane domains.** (A) CTLs were transfected with syb2-pHluorin (pHluorin fused to the luminal C terminus of Synaptobrevin2), Flower-pHluorin (pHluorin fused to the C terminus of Flower), and Flower-loop-pHluorin (pHluorin fused between the predicted second and third transmembrane segment of Flower). Cells were then imaged by confocal microscopy before and after applying 50  $\mu$ M CCCP to acidify the cytosol. Excitation was at 405 and 488 nm and emission measured at 515 nm. DMSO application was used as the control (bottom). Data are given as mean  $\pm$  SEM. (B) SIM images of CTLs transfected with *Drosophila* (dr) Flower-mRFP and stained with anti-RFP488 antibody before (top) and after permeabilization with 0.1% Triton X-100 (bottom). Bars, 5  $\mu$ m. (C) SIM image of a hippocampal neuron transfected with constructs from *Drosophila* and mouse Flower fused to mRFP and mTFP, respectively. The merged image on the right shows a clear colocalization of both proteins. Bars, 5  $\mu$ m.

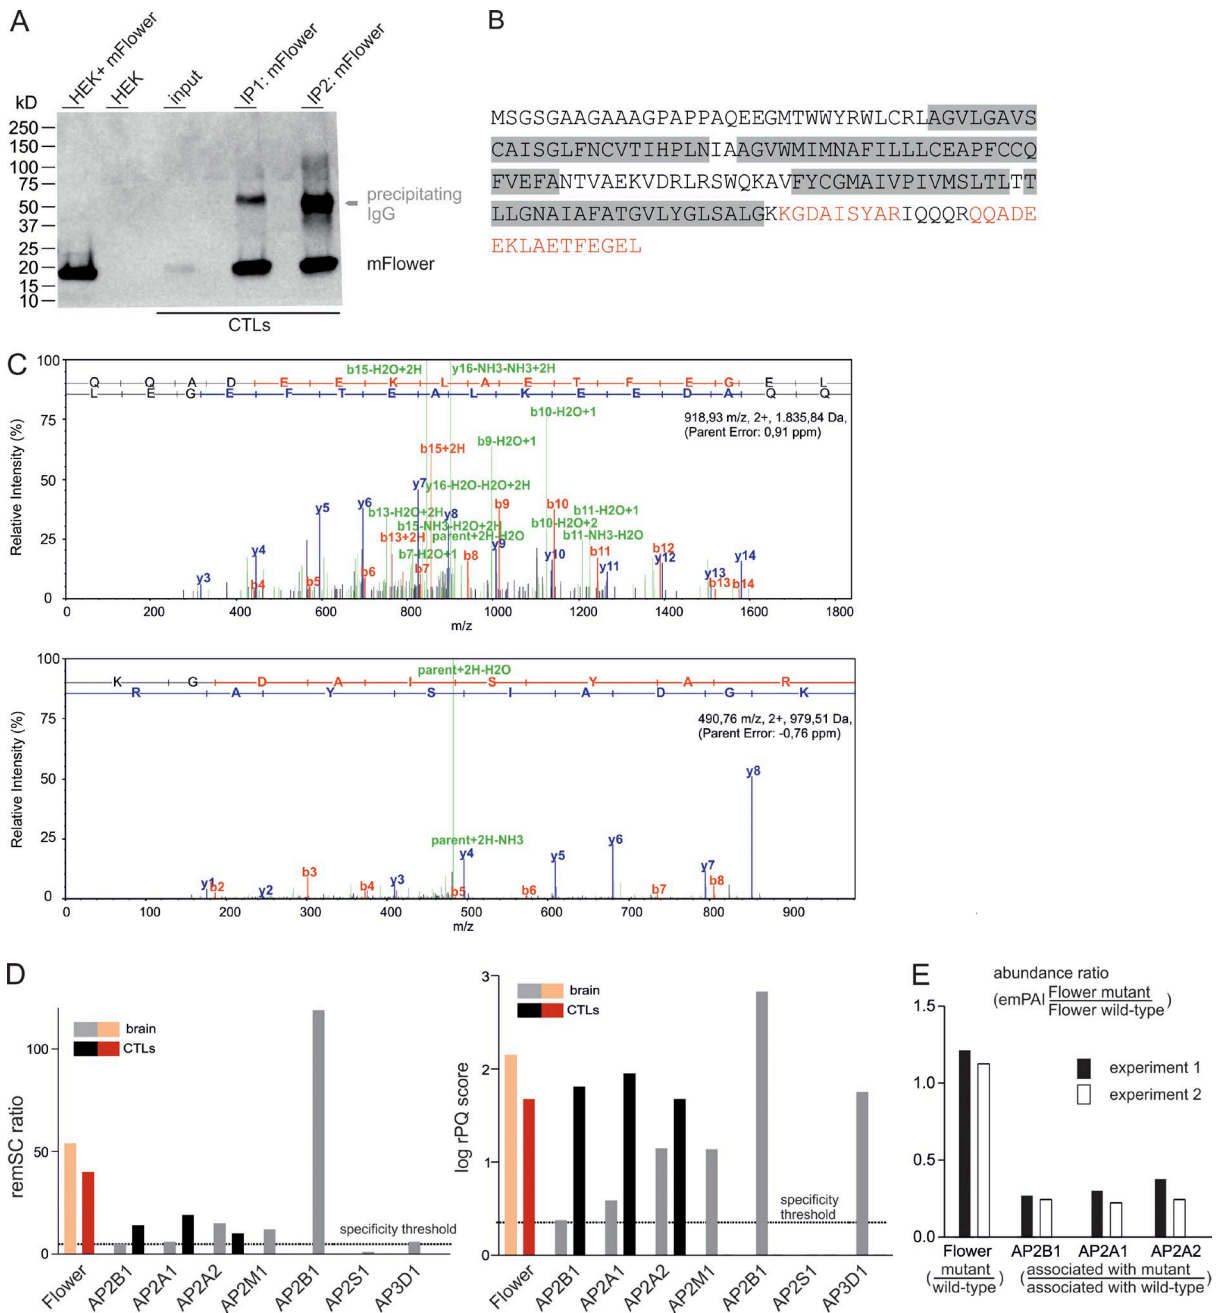

**Figure S4. Assembly of Flower with AP complexes.** (A) Western blot of protein aliquots eluted from the anti-Flower antibody after enrichment of the Flower-containing protein complexes from CTLs by using the anti-Flower antibody. Nontransfected HEK293 (HEK) and cells transfected with the mouse Flower cDNA (HEK+mFlower) served as the control. Input, aliquot of solubilized proteins before incubation with the anti-Fl antibody; IP1 and IP2, independent mFl antibody-based enrichments of Flower containing protein complexes. The ~18-kD Flower and the precipitating IgGs, recognized by the secondary anti-rabbit antibody, are indicated. (B) Proteins eluted from antibodies were separated on denaturing gels, in-gel trypsinized, and analyzed by nano-LC MS/MS. Primary sequence of the mouse Flower protein with the predicted transmembrane sequences shaded in gray. Amino acids of tryptic peptides identified with nano-LC MS/MS are in red (sequence coverage 1.5%). (C) MS/MS fragmentation spectra of tryptic peptides retrieved from the mouse Flower protein isolated from CTLs. (D) Histograms illustrating the distribution of the remSC ratio (left) and log rPQ score (right) of antibody-enriched proteins from brain and CTLs with corresponding specificity thresholds. Bars represent the enriched mFl protein from brain (yellow), CTLs (red) and the indicated AP proteins from brain (gray), and CTLs (black). The remSC ratio ( $\text{remSC}_{\text{IPmFl}}/\text{remSC}_{\text{IPIgG}}$ ) and the log rPQ score calculated from the rPQ score ( $\text{rPQ}_{\text{IPmFl}}/\text{rPQ}_{\text{IPIgG}}$ ) are shown. For proteins, which were not identified in the IgG control, the deviator value was set to 0.01. The dashed black line is the specificity threshold with log rPQ values >0.6. Similar results were obtained by quantification of peak volumes (mean of the three highest peptides areas measured for each protein, TOP<sup>3</sup> method; unpublished data). Data from nine independent analyses: CTLs with specific anti-Flower antibody ( $n = 2$ ) and IgG control ( $n = 1$ ); brain with specific mFlower antibody ( $n = 3$ ) and IgG control ( $n = 3$ ). (E) Abundance ratios of the TFP-tagged Flower or Flower mutant protein were calculated from the normalized emPAI values (extracted from Scaffold) obtained in the enriched Flower-TFP or Flower mutant-TFP-containing protein complexes. Measurements were done twice (black bar, experiment 1; white bar, experiment 2). Flower-containing protein complexes were obtained from Flower gene-deficient CTLs, which were transfected with either WT Flower or Flower mutant cDNAs (both subcloned into the pMax vector); to ensure comparable antibody-based enrichment of both variants, TFP was fused to the C terminus, and the anti-TFP antibody (AB234; Evrogen Joint Stock Company) was used to enrich both proteins after lysis of the transfected cells and solubilization of membrane proteins. Thereafter the Flower containing protein complexes were analyzed by MS as described in Materials and methods.



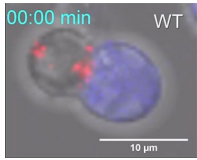

Video 1. **The specific block of endocytosis in CTLs from Flower-deficient mice by confocal microscopy.** Time-lapse maximal-intensity projections of syb2-mRFP (red) transfected CTLs conjugated to target cells in the presence of anti-RFP488 antibody (green) in the medium. 232 frames were collected and displayed at 24 frames/s. The corresponding still image is shown in Fig. 3 A.

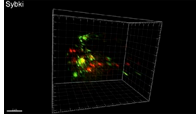

Video 2. **The 3D reconstruction of WT and Flower-deficient CTLs to demonstrate the block of endocytosis due to Flower deficiency.** 200-nm stack, 600 frames, 30 frames/s.

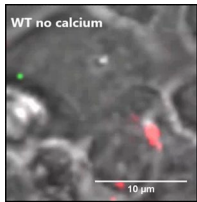

Video 3. **The rescue of the Flower phenotype by elevated calcium (confocal microscopy).** Time-lapse maximal-intensity projections of syb2-mRFP (red) transfected CTLs in contact with target cells before and after application of extracellular buffer containing 10 mM calcium. CTLs were incubated with target cells in the presence of anti-RFP488 antibody (green) in the medium for 30 min and then perfused with 10 mM calcium buffer. 117 frames were collected and displayed at 29 frames/s. The corresponding still image is shown in Fig. 5 A.

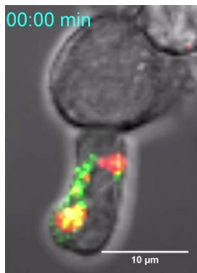

Video 4. **The polarization of Flower-containing vesicles to the IS before CG polarization (confocal microscopy).** Time-lapse maximal-intensity projections of a Flower-deficient CTL transfected with Flower-pHluorin (green) and syb2-mRFP (red) and conjugated to a target cell in the presence of anti-RFP405 antibody in the medium. 286 frames were collected and displayed at 25 frames/s. The corresponding still image is shown in the bottom row of Fig. 7 A.

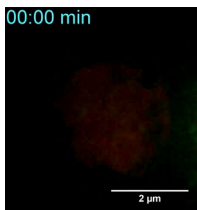

Video 5. **The polarization of Flower-containing vesicles to the IS before CG polarization (TIRFM).** Real-time dynamics of Flower-containing vesicles and CGs in CTL monitored by TIRFM. Flower-deficient CTLs were transfected with Flower-pHluorin (green) and syb2-mRFP (red). 1,000 frames were collected and displayed at 30 frames/s. The corresponding still image is shown in Fig. 7 B.

Table S1. Flower and AP proteins affinity purified with anti-Flower antibody from brain and CTLs and identified by nano-LC MS/MS

| Protein ID (UniProtKB) | remSC(brain) | remSC(CTLs) | rPQ score (brain) | rPQ score (CTLs) |
|------------------------|--------------|-------------|-------------------|------------------|
| FLOWER (Q8BG21)        | ∞            | ∞           | 144               | 48               |
| AP2B1 (Q9DBG3)         | 5            | ∞           | 2.49              | 64               |
| AP2A1 (P17426)         | 6            | ∞           | 3.9               | 88               |
| AP2A2 (P17427)         | 15           | ∞           | 14.3              | 48               |
| AP2M1 (P84091)         | 12           | —           | 14                | —                |
| AP1B1 (O35643)         | ∞            | —           | 672               | —                |
| AP2S1 (P62743)         | 1            | —           | 1                 | —                |
| AP3D1 (O54774)         | ∞            | —           | 56                | —                |

For methods used for protein enrichment and MS, see Materials and methods. Values for remSC >5 and rPQ scores >4 refer to specific enrichment of AP proteins by anti-Flower antibody over negative control anti-IgGs. Number of experiments analyzed, *n* = 9: IPs from CTLs with specific mFlower antibody (*n* = 2) and IgG control (*n* = 1); IPs from brain with specific mFlower antibody (*n* = 3) and IgG control (*n* = 3).

Table S2. **Plasmids generated in the laboratories of the authors and used in this study**

| Plasmid | mFl construct                                                         | Vector backbone              | Comment                                                  |
|---------|-----------------------------------------------------------------------|------------------------------|----------------------------------------------------------|
| pSB_234 | mFl <sub>A</sub>                                                      | pcDNA3 (with STOP)           |                                                          |
| pSB_235 |                                                                       | pcDNA3 (without STOP)        |                                                          |
| pSMa_79 |                                                                       | pcAGGS2-IRES-mRFP            |                                                          |
| pSMa_80 |                                                                       | pcAGGS2-IRES dsRed-Express   |                                                          |
| pSMa_91 |                                                                       | pcAGGS2-IRES-GFP             |                                                          |
| pSMa_48 | mFl <sub>A</sub> (R)pHluorin                                          | pSFV1 (Semliki Forest Virus) | C-terminal fusion                                        |
| pSB_123 |                                                                       | pcAGGS2                      |                                                          |
| pSMa_57 | mFl <sub>A</sub> (S)pHluorin                                          | pSFV1 (Semliki Forest Virus) | C-terminal fusion                                        |
| pSMa_56 |                                                                       | pcAGGS2                      |                                                          |
| pSMa_59 | mFl <sub>B</sub> (R)pHluorin                                          | pcAGGS2                      | C-terminal fusion                                        |
| pSMa_61 | mFl <sub>D</sub> (R)pHluorin                                          | pcAGGS2                      | C-terminal fusion                                        |
| pSMa_62 | mFl <sub>E</sub> (R)pHluorin                                          | pcAGGS2                      | C-terminal fusion                                        |
| pSMa_63 | mFl <sub>A</sub> -mRFP                                                | pcAGGS2                      | C-terminal fusion                                        |
| pSMa_64 | mFl <sub>B</sub> -mRFP                                                | pcAGGS2                      | C-terminal fusion                                        |
| pSMa_66 | mFl <sub>D</sub> -mRFP                                                | pcAGGS2                      | C-terminal fusion                                        |
| pSMa_67 | mFl <sub>E</sub> -mRFP                                                | pcAGGS2                      | C-terminal fusion                                        |
| pSMa_68 | mFl <sub>B</sub>                                                      | pcAGGS-IRES-GFP              |                                                          |
| pSMa_69 | mFl <sub>D</sub>                                                      | pcAGGS-IRES-GFP              |                                                          |
| pSMa_70 | mFl <sub>E</sub>                                                      | pcAGGS-IRES-GFP              |                                                          |
| pSMa_83 | mFl <sub>A</sub> -V50C                                                | pcAGGS-IRES-GFP              | V50C mutant mFl                                          |
| pSMa_84 | mFl <sub>A</sub> -V50C-(R)pHluorin                                    | pcAGGS2                      |                                                          |
| pSMa_88 | mFl <sub>A</sub> -TM2-GFP-TM3                                         | pcAGGS2                      | GFP in the linker between TM2 and TM3                    |
| pSMa_89 | (R)pHluorin-mFl <sub>A</sub>                                          | pcAGGS2                      | N-terminal fusion                                        |
| pSB_80  | mFl <sub>A</sub> -TM2-HA-TM3                                          | pcAGGS-IRES-GFP              | HA-Tag in the linker between TM2 and TM3                 |
| pSB_152 | mFl <sub>A,E74A</sub>                                                 | pcAGGS-IRES-GFP              | E74A mutant                                              |
| pSB_217 | GCaMP6f-Gly <sub>10</sub> -mFl <sub>A</sub> (mut)                     | pcDNA3                       | N-terminal fusion                                        |
| pSB_226 |                                                                       | pcAGGS-IRES-TagRFP-T         |                                                          |
| pSB_218 | GCaMP6f-Gly <sub>10</sub> -mFl <sub>A</sub> (wt)                      | pcDNA3                       | N-terminal fusion                                        |
| pSB_227 |                                                                       | pcAGGS-IRES-TagRFP-T         |                                                          |
| pSB_219 | His-GCaMP6f-Gly <sub>10</sub> -mFl <sub>A</sub> (mut)                 | pcDNA3                       | N-terminal fusion                                        |
| pSB_228 |                                                                       | pcAGGS-IRES-TagRFP-T         |                                                          |
| pSB_231 |                                                                       | pMax-TagRFP-T                |                                                          |
| pSB_282 |                                                                       | pMax                         |                                                          |
| pSB_220 | His-GCaMP6f-Gly <sub>10</sub> -mFl <sub>A</sub> (wt)                  | pcDNA3                       | N-terminal fusion                                        |
| pSB_229 |                                                                       | pcAGGS-IRES-TagRFP-T         |                                                          |
| pSB_232 |                                                                       | pMax-TagRFP-T                |                                                          |
| pSB_283 |                                                                       | pMax                         |                                                          |
| pSB_236 | mFl <sub>A</sub> -GST-Fusion                                          | pcDNA3                       |                                                          |
| pSB_247 | Fl <sub>A</sub>                                                       | pMax-TagRFP-T                |                                                          |
| pSB_248 | Koz-mFl <sub>A</sub> (wt)-(R)pHluorin- mFl <sub>A</sub> (wt)-tagRFP-T | pMax-TagRFP-T                | Tandem mFl <sub>A</sub> cDNA with (R)pHluorin in between |
| pSB_249 | mFl <sub>A</sub> (wt)-GCaMP6f-mFl <sub>A</sub> -tagRFP-T              | pMax-TagRFP-T                | Tandem mFl <sub>A</sub> cDNA with GCaMP6f in between     |
| pSB_272 | Flower(TM1)-GCaMP6f                                                   | pMax                         | C-terminal fusion of mFl TM1 with GCaMP6f                |
| pSB_273 | Flower(TM1)-GCaMP6f-tagRFP-T-Stop                                     | pMax                         | C-terminal fusion of mFl TM1 with GCaMP6f-tagRFP-T       |
| pSB_274 | Flower(TM1)-tagRFP-T                                                  | pMax                         | C-terminal fusion                                        |
| pSB_343 | mFl <sub>A</sub> (wt)-mTFP                                            | pMax                         |                                                          |
| pSB_344 | mFl <sub>A</sub> (mut)-mTFP                                           | pMax                         |                                                          |
|         | drFl <sub>A</sub> -mRFP                                               | pMax                         |                                                          |
| pSMa_92 | TagRFP-T-mFl <sub>A</sub>                                             | pcAGGS2                      | N-terminal fusion                                        |
| pSB_353 | mFl <sub>A</sub> (mut)                                                | pcAGGS-IRES-GFP              |                                                          |

The HisGCaMP6f and (R)pHluorin cDNAs have been described previously (Miesenböck et al., 1998; Chen et al., 2013). The *Drosophila* Flower cDNA (drFl<sub>A</sub>; NCBI Reference Sequence: NM\_140547.5) was codon optimized for *Mus musculus*, synthesized by Integrated DNA Technologies (Leuven), fused to mRFP, and subcloned into pMax. Fl<sub>A</sub>, full-length mouse Flower cDNA encoding 171 amino acid residues (accession number NM\_029862); mut, mutations introduced in Fl<sub>A</sub> as indicated in Fig. 8 A; wt, WT Fl<sub>A</sub>.

Table S3. **Antibodies used in this study**

| Antibody                                            | Supplier/reference             | Identifier                                            | Source     |
|-----------------------------------------------------|--------------------------------|-------------------------------------------------------|------------|
| Anti-mouse flower                                   | Generated in-house, this study | mFl                                                   | Rabbit pc  |
| Anti-CD3e                                           | BD Pharmingen                  | 145-2C11                                              | Hamster pc |
| Anti-CD107a-PE                                      | BioLegend                      | 1D4B                                                  | Rat pc     |
| Anti-RFP                                            | Genway Biotech                 | GWB-3BF-397                                           | Rabbit, pc |
| Anti-TagRFP+                                        | Evrogen                        | AB234                                                 | Rabbit, pc |
| Anti-HA                                             | Roche                          | 3F10                                                  | Rat, mc    |
| Anti-alpha1 Na <sup>+</sup> /K <sup>+</sup> -ATPase | Abcam                          | Ab 7671                                               | Mouse mc   |
| Anti-calnexin                                       | Stressgen                      | SPA-865                                               | Rabbit pc  |
| Anti-GAPDH                                          | Abcam                          | (6C5) ab 8245                                         | Mouse mc   |
| Anti-granzyme Alexa Fluor 647                       | BioLegend                      | AAN01                                                 | Mouse mc   |
| Alexa Fluor-conjugated secondary anti-rabbit/mouse  | Invitrogen                     | Alexa Fluor 488<br>Alexa Fluor 561<br>Alexa Fluor 647 | Goat, pc   |
| Secondary anti-rabbit                               | GE Healthcare                  | NA9340                                                | Donkey     |
| Secondary anti-mouse                                | GE Healthcare                  | NA9310                                                | Sheep      |

The in-house generated antibody for mouse Flower is described in Materials and methods. mc, monoclonal; pc, polyclonal.

Table S4. **Oligodeoxynucleotide primers used for genotyping**

| Identifier | Primers                        |
|------------|--------------------------------|
| WU4-101    | 5'-CGTTAATCTGATGCATGAGCC-3'    |
| RAF5       | 5'-CACACCTCCCCCTGAACCTGAAAC-3' |
| SB-32      | 5'-GGATGAGTCAGTGTCTGTGC-3'     |
| SB-33      | 5'-GGATGAGTCAGTGTCTGTGC-3'     |
| SM-206     | 5'-GGATTACAGCGACAGATGC-3'      |
| SM-392     | 5'-GAGGGAAGGGATGTCAGCC-3'      |
| SM-393     | 5'-GAAAGCTACCGTCACATACC-3'     |
| SM-395     | 5'-AAGATATGGCTGAGAGGTGG-3'     |
| SM-396     | 5'-TCACGTAGGCCTTGGAGCC-3'      |

## References

- Butt, T.R., S.C. Edavettal, J.P. Hall, and M.R. Mattern. 2005. SUMO fusion technology for difficult-to-express proteins. *Protein Expr. Purif.* 43:1–9. <https://doi.org/10.1016/j.pep.2005.03.016>
- Chen, T.W., T.J. Wardill, Y. Sun, S.R. Pulver, S.L. Renninger, A. Baohan, E.R. Schreiter, R.A. Kerr, M.B. Orger, V. Jayaraman, et al. 2013. Ultrasensitive fluorescent proteins for imaging neuronal activity. *Nature.* 499:295–300. <https://doi.org/10.1038/nature12354>
- Kyte, J., and R.F. Doolittle. 1982. A simple method for displaying the hydropathic character of a protein. *J. Mol. Biol.* 157:105–132. [https://doi.org/10.1016/0022-2836\(82\)90515-0](https://doi.org/10.1016/0022-2836(82)90515-0)
- Matti, U., V. Pattu, M. Halimani, C. Schirra, E. Krause, Y. Liu, L. Weins, H.F. Chang, R. Guzman, J. Olausson, et al. 2013. Synaptobrevin2 is the v-SNARE required for cytotoxic T-lymphocyte lytic granule fusion. *Nat. Commun.* 4:1439. <https://doi.org/10.1038/ncomms2467>
- Meissner, M., V.C. Obmann, M. Hoshcke, S. Link, M. Jung, G. Held, S.E. Philipp, R. Zimmermann, and V. Flockerzi. 2011. Lessons of studying TRP channels with antibodies. In *TRP Channels*. M.X. Zhu, editor. CRC Press, Boca Raton, FL. Chapter 6.
- Miesenböck, G., D.A. De Angelis, and J.E. Rothman. 1998. Visualizing secretion and synaptic transmission with pH-sensitive green fluorescent proteins. *Nature.* 394:192–195. <https://doi.org/10.1038/28190>
- Trentmann, O., M. Horn, A.C. van Scheltinga, H.E. Neuhaus, and I. Haferkamp. 2007. Enlightening energy parasitism by analysis of an ATP/ADP transporter from chlamydiae. *PLoS Biol.* 5:e231. <https://doi.org/10.1371/journal.pbio.0050231>
